# Supplementary material
Source: Springer Nature journal article supplement (https://www.springermedizin.de/resource/supplementary/13041_2010_91_MOESM8_ESM.pdf/25657500)

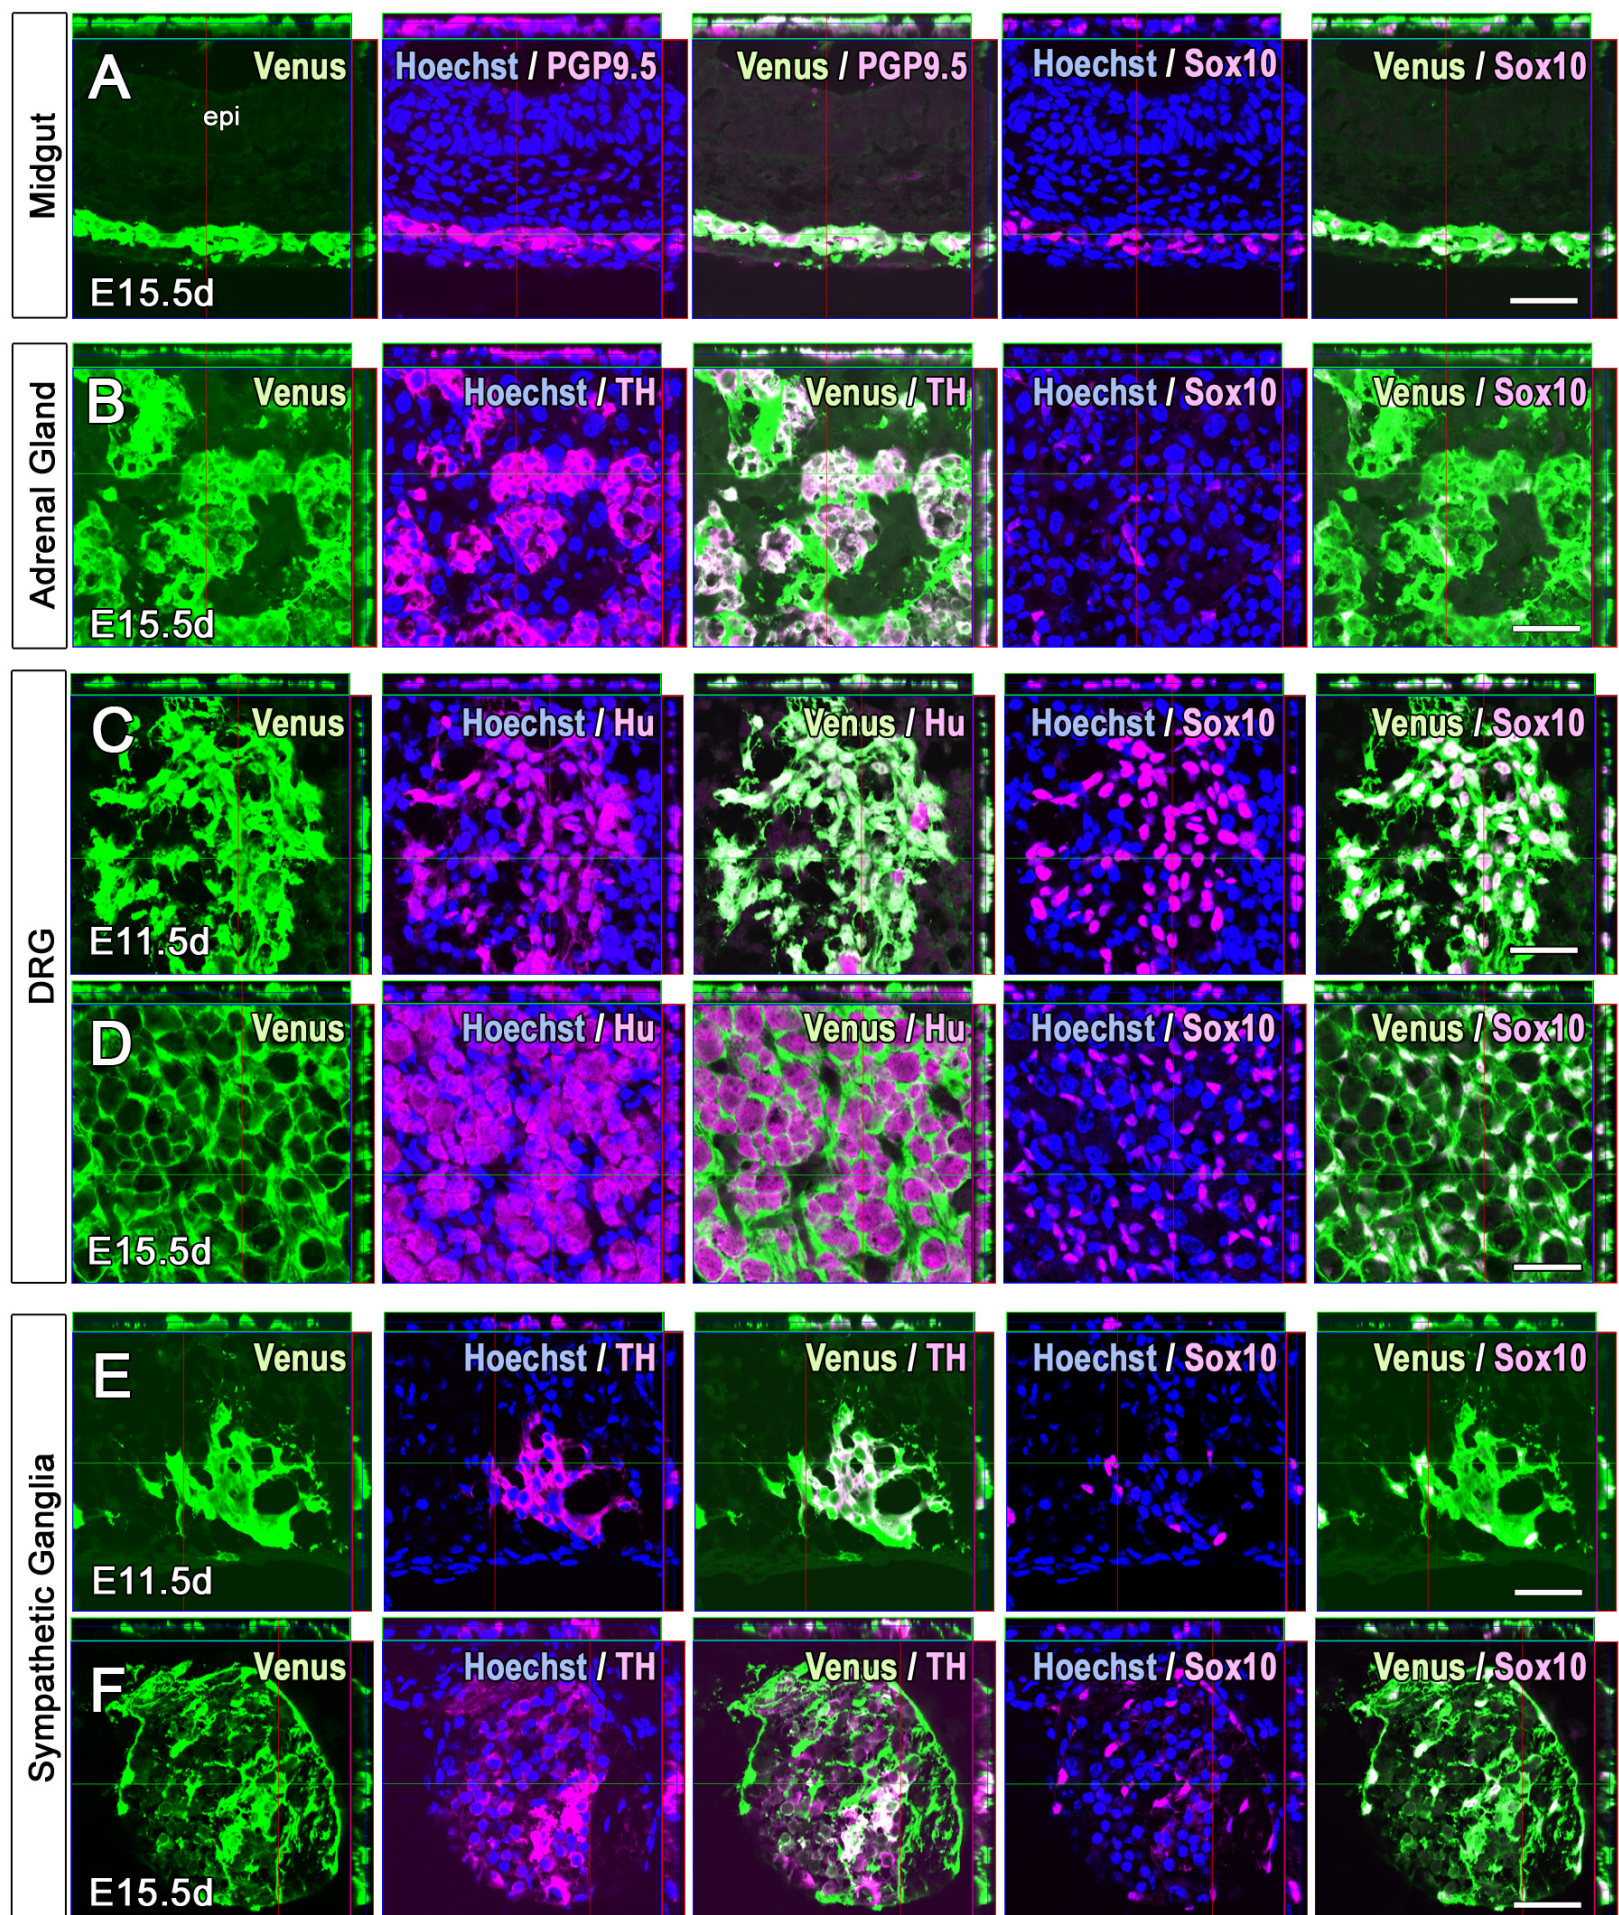

Supplement: MOESM8 [file 25657500]
